# Supplementary material for: Maleic acid as a dicarboxylic acid hydrotrope for sustainable fractionation of wood at atmospheric pressure and ≤100 °C: mode and utility of lignin esterification
Source: Royal Society of Chemistry journal article supplement (doi:10.1039/c9gc04267a), 2020-01-01
Supplement: c9gc04267a1.pdf [file c9gc04267a1.pdf]

## Electronic Supplementary Information

### **Maleic acid as a dicarboxylic acid hydrotrope for green fractionation of wood at atmospheric pressure and $\leq 100$ °C: Mode and utility of lignin esterification**

Cheng Cai,<sup>a, b</sup> Kolby Hirth,<sup>b</sup> Rolland Gleisner,<sup>b</sup> Hongming Lou,<sup>a</sup> Xueqing Qiu,<sup>a</sup> J.Y. Zhu<sup>\*b</sup>

<sup>a</sup> School of Chemistry and Chemical Engineering, South China University of Technology, Guangzhou, China

<sup>b</sup> USDA Forest Service, Forest Products Lab., Madison, Wisconsin, United States. Email: [junyong.zhu@usda.gov](mailto:junyong.zhu@usda.gov)

## Calculations

### 1. Calculation of substrate enzymatic digestibility (SED):

$$\text{SED} = c_{\text{glucose}} \times 0.05 \times 0.9 / m_{\text{glucan}} \times 100\%$$

Here,  $c_{\text{glucose}}$  is the concentration of glucose in hydrolysate, 0.05 (L) is the volume of hydrolysate, 0.9 is the mass conversion factor between glucan and glucose,  $m_{\text{glucan}}$  is the mass of glucan in substrate.

### 2 Calculation of furfural yield:

$$\text{Total furfural yield} = (c_1 \times 0.02 + c_2 \times 0.01) \times 50/15 \times 1.375 / (3 \times 0.2299 \times 0.69) \times 100\%$$

$$\text{Pure furfural yield} = (c_1 \times 0.02) \times 50/15 \times 1.375 / (3 \times 0.2299 \times 0.69) \times 100\%$$

Here,  $c_1$  is the concentration of furfural in the distillate,  $c_2$  is the concentration of furfural in the dehydrated fractionation liquor, 0.02 (L) and 0.01 (L) is the volume of the distillate and the dehydrated fractionation liquor, respectively. 50/15 is the dilution factor of fractionation liquid to precipitate lignin. 1.375 is the mass conversion factor between xylan and furfural,  $3 \times 0.2299 \times 0.69$  (g) is the mass of dissolved xylan in spent liquid.

### 3 Calculation of syringyl and guaiacyl and of interunit linkages:

The total aromatic areas are defined as:

$$I(\text{C9}) = 0.5 \times I(\text{S}_{2,6}) + 0.5 \times I(\text{S}'_{2,6}) + I(\text{S}_{\text{cond}}) + I(\text{G}_2).$$

The content of internal linkages are calculated as:

$$\beta\text{-O-4} = 100 \times [I(\beta\text{-O-4})] / [I(\text{C9})];$$

$$\beta\text{-}\beta = 100 \times [I(\beta\text{-}\beta)] / [I(\text{C9})];$$

$$\beta\text{-5} = 100 \times [I(\beta\text{-5})] / [I(\text{C9})].$$

Content of aromatic units are relative (%):

$$\text{S} = 100 \times 0.5 \times [I(\text{S}_{2,6})] / [I(\text{C9})];$$

$$\text{S}' = 100 \times 0.5 \times [I(\text{S}'_{2,6})] / [I(\text{C9})];$$

$$\text{S}_{\text{cond}} = 100 \times [I(\text{S}^*)] / [I(\text{C9})];$$

$$\text{G} = 100 \times [I(\text{G}_2)] / [I(\text{C9})];$$

The S/G ratio is defined as:

$$\text{S/G} = (\text{S} + \text{S}' + \text{S}_{\text{cond}}) / \text{G}.$$

Here,  $I$  is the integrated area of the crosspeaks in HSQC spectra. Although 2D HSQC are not inherently quantitative, the analysis provides semi-quantitative information about relative quantities of various functionalities based on per 100 Ar units.

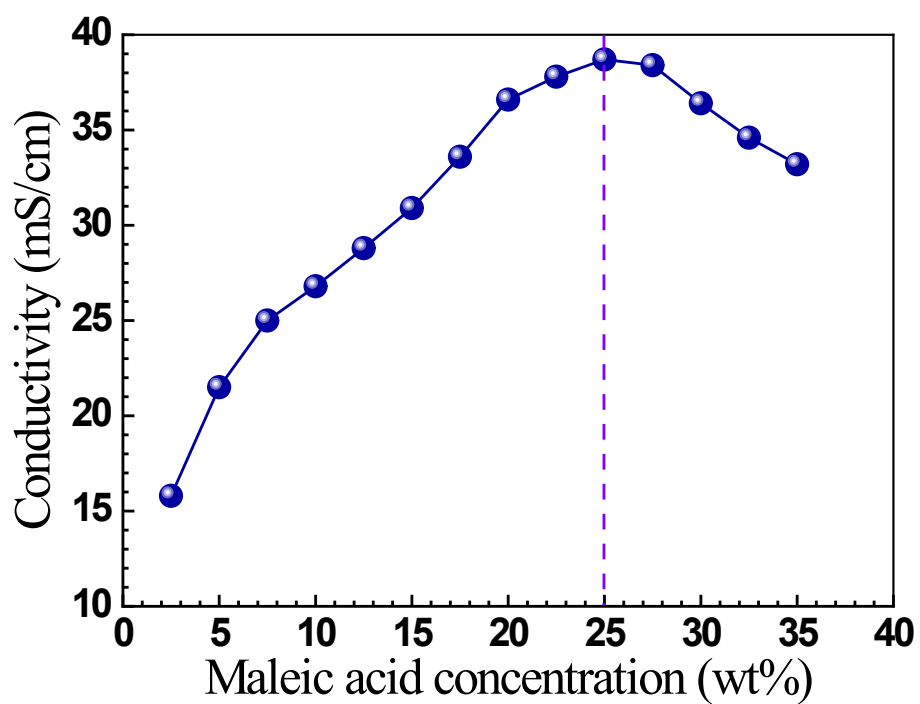

**Figure S1.** Conductivity of aqueous maleic acid solution as a function of concentration to determine minimal acid concentration.

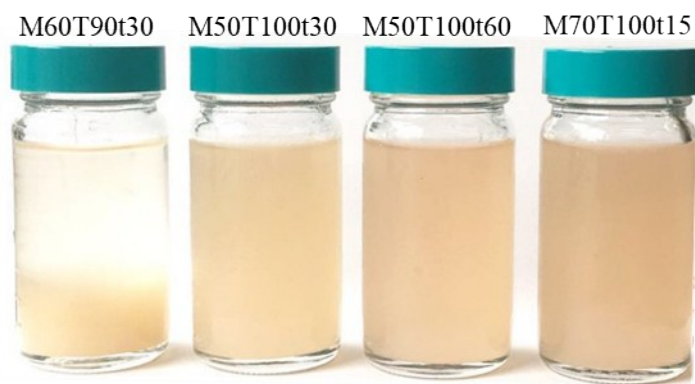

**Figure S2.** Stability of aqueous dispersion of LCNFs at 0.2% after standing for two weeks at 4 °C

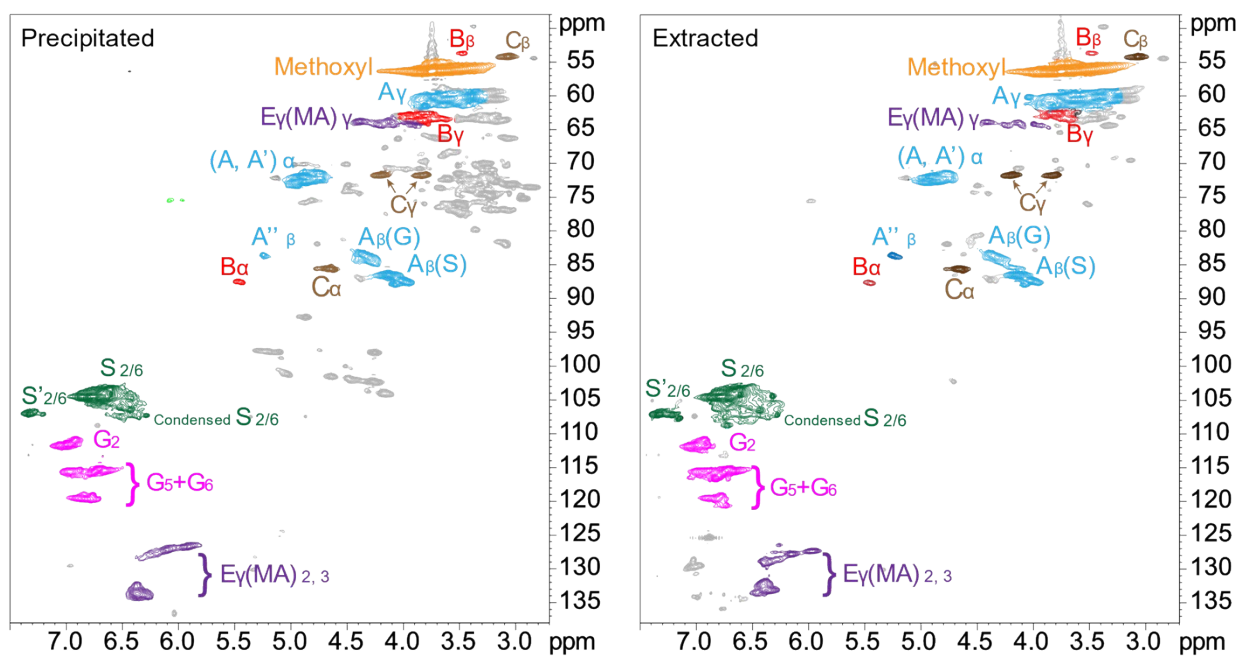

**Figure S3.** Comparison of chemical structure of dilution precipitated lignin (left panel) with that of pentanol extracted lignin (right panel) from run M50T100t30 through 2-D NMR HSQC analysis

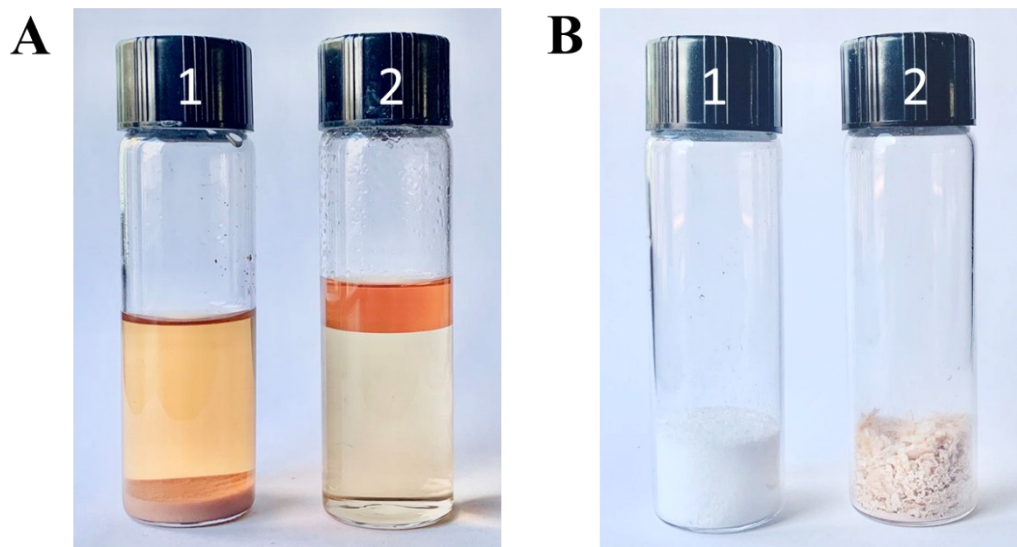

**Figure S4.** A1: The spent liquor of M50T100t30 diluted to MA concentration 15 wt% to precipitate lignin; A2: After removing precipitated lignin through centrifuging and added 20% (v/v) of n-pentanol to extract remaining dissolved lignin. B1: Fresh MA; B2: MA obtained by evaporating water in the dehydrated fractionation liquor for recycle and reuse.

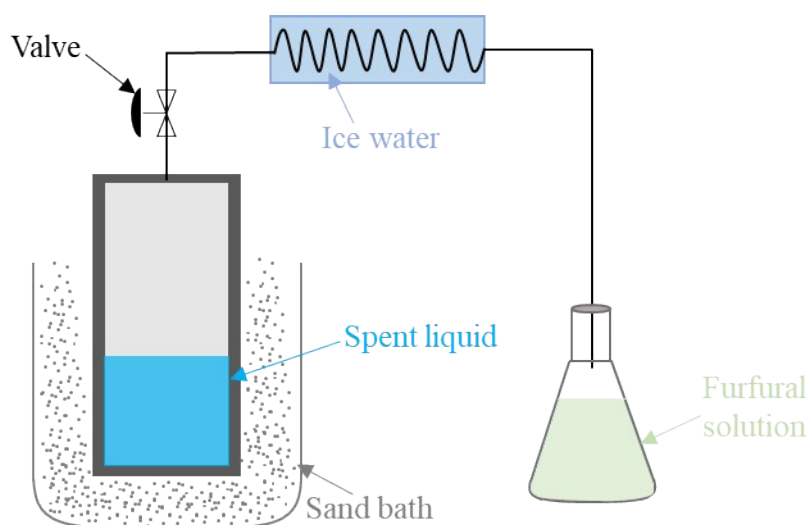

**Figure S5.** Fractionation liquid after removing lignin is subjected to reactive distillation to dehydrate xylose into furfural and to recycle MA.

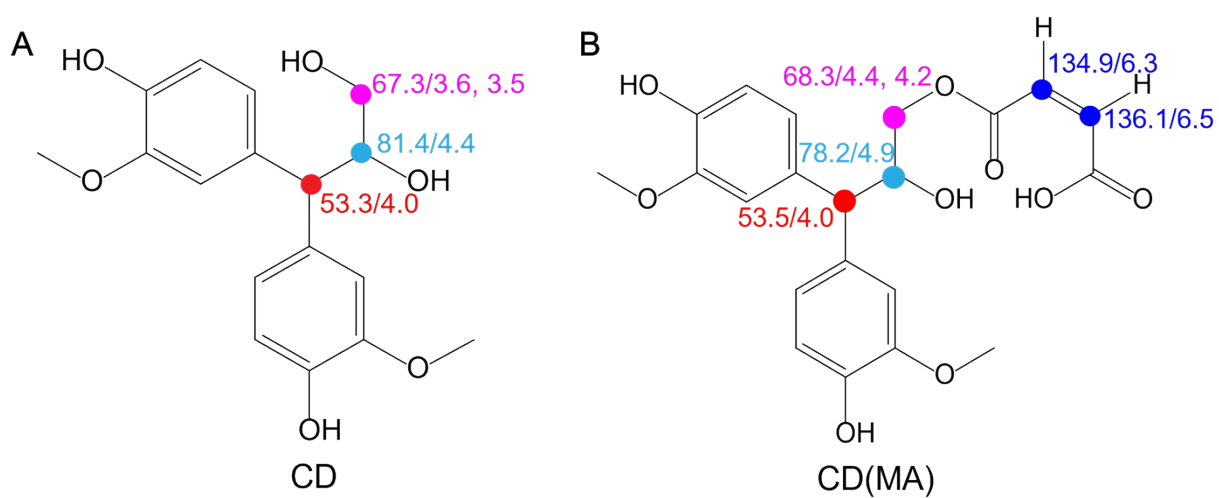

**Figure S6.** Prediction of  $^{13}\text{C}$  and  $^1\text{H}$  NMR shifts of Ey and Ey(MA) by ChemBioDraw Ultra 14.0.

**Table S1** Chemical composition of MAHF fractionated WIS and their corresponding fractionation liquors under different conditions. The numbers if the parenthesis are percentages of the component retained in WIS or percentages of wood xylan converted to xylose.

| Sample      | WISs <sup>1</sup> |                   |             |             | Spent liquor  |              |                   |
|-------------|-------------------|-------------------|-------------|-------------|---------------|--------------|-------------------|
|             | Solids Yield (%)  | Klason Lignin (%) | Glucan (%)  | Xylan (%)   | Glucose (g/L) | Xylose (g/L) | Acetic acid (g/L) |
| Birch       |                   | 19.5              | 39.96       | 22.99       |               |              |                   |
| M50T80t60   | 76.4              | 19.3 (75.4)       | 48.8 (93.3) | 19.3 (64.0) | 0.26          | 2.93 (11.2)  | 1.34              |
| M60T80t60   | 71.9              | 18.5 (68.1)       | 48.5 (87.2) | 18.0 (56.4) | 0.35          | 6.15 (23.5)  | 1.43              |
| M70T80t60   | 66.0              | 15.9 (53.8)       | 52.2 (86.3) | 14.8 (42.5) | 0.36          | 12.5 (47.9)  | 1.69              |
| M50T90t60   | 65.7              | 18.4 (61.9)       | 51.5 (84.6) | 15.6 (44.5) | 0.41          | 4.74 (18.1)  | 2.05              |
| M60T90t30   | 64.0              | 15.8 (51.9)       | 55.3 (88.6) | 14.0 (39.0) | 0.68          | 9.73 (37.2)  | 1.67              |
| M50T100t30  | 64.7              | 15.4 (51.5)       | 58.4 (94.5) | 11.0 (31.0) | 0.20          | 9.46 (36.2)  | 2.68              |
| M50T100t60  | 56.4              | 17.5 (50.6)       | 59.2 (83.5) | 12.2 (29.9) | 0.75          | 16.8 (64.4)  | 3.31              |
| M50T100t90  | 57.5              | 16.0 (47.2)       | 58.1 (83.6) | 10.7 (26.8) | 0.79          | 16.9 (64.7)  | 3.20              |
| M50T100t120 | 54.3              | 16.0 (44.6)       | 57.8 (78.6) | 11.8 (27.9) | 0.98          | 17.2 (65.8)  | 3.20              |
| M70T100t15  | 60.3              | 17.7 (54.7)       | 58.6 (88.2) | 11.5 (30.1) | 0.46          | 13.2 (50.3)  | 1.72              |

Table S2 Comparison of maleic acid hydrotropic fractionation to other pretreatment methods for enzymatic saccharification of wood.

| Wood                   | Fractionation condition                                                                                                                               | Xylan; lignin removal (%)  | Enzyme loading (FPU/per g glucan)                            | Substrate enzymatic digestibility (SED) @ 72 h (%) | Method and Source                                 |
|------------------------|-------------------------------------------------------------------------------------------------------------------------------------------------------|----------------------------|--------------------------------------------------------------|----------------------------------------------------|---------------------------------------------------|
| Birch fibers           | Maleic acid = 50 wt%<br>T = 100 °C<br>t = 60 min                                                                                                      | 70 ; 49                    | CTec 3 = 10<br>(or 6 FPU/g solids)                           | 89 ± 3                                             | Maleic Acid Hydrotrope<br>This study              |
| Poplar NE222 fibers    | <i>p</i> -TsOH = 50 wt%<br>T = 90 °C<br>t = 112 min                                                                                                   | 80 ; 84                    | CTec 3 = 20                                                  | 93 ± 2                                             | Aromatic Acid Hydrotrope <sup>1</sup>             |
| Poplar NE222 fibers    | <i>p</i> -TsOH = 75 wt%<br>T = 80 °C<br>t = 20 min                                                                                                    | 81 ; 86                    | CTec 3 = 10<br>20                                            | 59<br>87                                           | Aromatic acid Hydrotrope <sup>2</sup>             |
| Birch particles (2 mm) | Acetone = 50 wt%<br>+ H <sub>2</sub> SO <sub>4</sub> @ 3.9 g/L<br>T = 140 °C<br>t = 120 min                                                           | 92 ; 86                    | Accelerase TRIO = 14<br>(or 10 FPU/g solids)                 | ~ 90                                               | Acetone Organosolv <sup>3</sup>                   |
| Birch chips            | Na <sub>2</sub> CO <sub>3</sub> = 26.5 g/L<br>T = 120 °C<br>t = 1200 min<br>Steam H <sub>2</sub> SO <sub>4</sub> = 5 g/L<br>T = 200 °C<br>t = 5 min   | ~100 ; NA<br><br>~100 ; NA | Celluclast 1.5 L =<br>10 FPU/g solids<br><br>+ Novozymes 188 | ~ 95<br><br>~ 95                                   | Alkaline Oxidation & Steam Explosion <sup>4</sup> |
| Poplar NE222 chips     | T = 160 °C; t = 58 min<br>H <sub>2</sub> SO <sub>4</sub> = 0.2 %;<br>@ NaHSO <sub>3</sub> = 0 % (Dilute acid)<br>@ NaHSO <sub>3</sub> = 1.3 % (SPORL) | 78 ; 3<br>84 ; 31          | CTec 3 = 10                                                  | 52<br>80                                           | SPORL & Dilute Acid <sup>5</sup>                  |

1. J. Zhu, L. Chen, R. Gleisner and J. Y. Zhu, *Fuel*, 2019, **254**,115572 DOI:10.1016/j.fuel.2019.05.155.
2. L. Chen, J. Dou, Q. Ma, N. Li, R. Wu, H. Bian, D. J. Yelle, T. Vuorinen, S. Fu, X. Pan and J. Y. Zhu, *Sci. Adv.*, 2017, **3**, e1701735.
3. A. Smit and W. Huijgen, *Green Chem.*, 2017, **19**, 5505-5514.
4. A. Kallioinen, M. Hakola, T. Riekkola, T. Repo, M. Leskelä, N. Von Weymarn and M. Siika-aho, *Bioresour. Technol.*, 2013, **140**, 414-420.
5. J. Zhang, F. Gu, J. Y. Zhu and R. S. Zalesny, *Bioresour. Technol.*, 2015, **186**, 223-231.
